# Supplementary material
Source: Springer Nature journal article supplement (https://www.springermedizin.de/resource/supplementary/12936_2008_852_MOESM2_ESM.pdf/9548400)

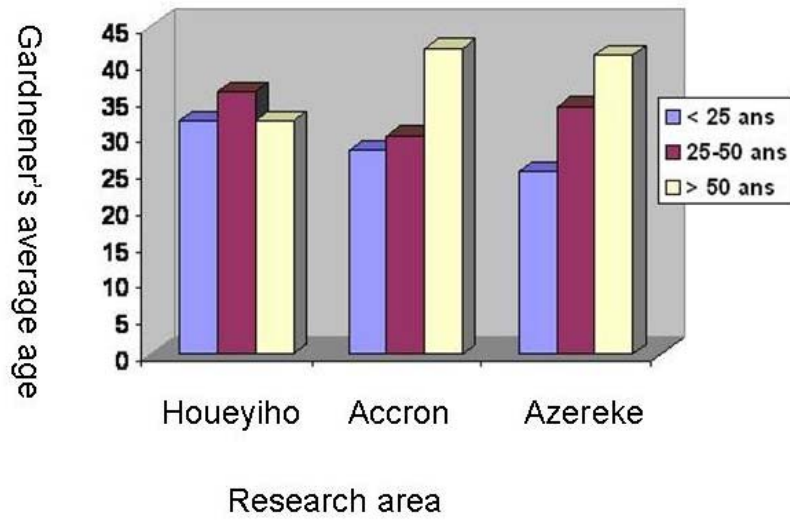

**Figure 4:** Average age of market gardeners at the three sites of study (October 2005-december 2006).

Supplement: MOESM2 [file 9548400]
